# Supplementary material for: GATA-1 genome-wide occupancy associates with distinct epigenetic profiles in mouse fetal liver erythropoiesis
Source: PubMed Central journal article supplement — Nucleic Acids Res. 2013 Mar 20;41(9):4938–48. doi: 10.1093/nar/gkt167 (PMC3643580; doi:10.1093/nar/gkt167), 2013-03-20
Supplement: supp_gkt167_nar-00049-h-2013-File010.pdf [file supp_gkt167_nar-00049-h-2013-File010.pdf]

**TABLE S1**

|                          | <b>Ter119<sup>-</sup></b> | <b>Ter119<sup>+</sup></b> | <b>Common</b> | <b>Total</b> |
|--------------------------|---------------------------|---------------------------|---------------|--------------|
| <b>1kb TSS</b>           | 919                       | 1008                      | 513           | 1414         |
| <b>2kb TSS</b>           | 1280                      | 1402                      | 756           | 1926         |
| <b>5kb TSS</b>           | 1883                      | 2058                      | 1201          | 2740         |
| <b>10kb TSS</b>          | <b>2590</b>               | <b>2826</b>               | <b>1765</b>   | <b>3651</b>  |
| <b>20kb TSS</b>          | 3770                      | 4113                      | 2785          | 5098         |
| <b>20kb TSS 10kb TES</b> | 4511                      | 5080                      | 3460          | 6131         |
| <b>NEAREST GENE</b>      | 2874                      | 3100                      | 2048          | 3926         |

Table S1. Number of GATA-1 target genes proposed by different target gene assignment method

**TABLE S2**

|                   | <b>Ter119<sup>-</sup></b> | <b>Ter119<sup>+</sup></b> | <b>Common</b> | <b>Ter119<sup>-</sup> Unique</b> | <b>Ter119<sup>+</sup> Unique</b> |
|-------------------|---------------------------|---------------------------|---------------|----------------------------------|----------------------------------|
| <b>Class I</b>    | 436                       | 353                       | 199           | 19                               | 6                                |
| <b>Class II</b>   | 720                       | 715                       | 222           | 123                              | 143                              |
| <b>Class III</b>  | 1434                      | 1758                      | 511           | 683                              | 912                              |
| <b>Ascending</b>  |                           |                           | 353           |                                  |                                  |
| <b>Descending</b> |                           |                           | 480           |                                  |                                  |
| <b>Total</b>      | <b>2590</b>               | <b>2826</b>               | <b>1765</b>   | <b>825</b>                       | <b>1061</b>                      |

Table S2. Number of GATA-1 target genes in TGS Classes

# TABLE S3

| Dependent Variable                | Predictors                          | # of Predictors | # of Samples | ntrree | mtry | Training (85%) | Testing (15%) | Sampling | Training R^2 | Testing R^2 | Full Dataset R^2 |
|-----------------------------------|-------------------------------------|-----------------|--------------|--------|------|----------------|---------------|----------|--------------|-------------|------------------|
| Gene Expression Change (log2(FC)) | GATA-1 (1kb TSS)                    | 11              | 1414         | 1000   | 1    | 1202           | 212           | 100      | 0.06         | 0.06        | 0.06             |
| Gene Expression Change (log2(FC)) | GATA-1 (2kb TSS)                    | 11              | 1926         | 1000   | 1    | 1637           | 289           | 100      | 0.07         | 0.07        | 0.08             |
| Gene Expression Change (log2(FC)) | GATA-1 (5kb TSS)                    | 11              | 2740         | 1000   | 1    | 2329           | 411           | 100      | 0.12         | 0.12        | 0.12             |
| Gene Expression Change (log2(FC)) | GATA-1 (10kb TSS)                   | 11              | 3651         | 1000   | 1    | 3103           | 548           | 100      | 0.13         | 0.14        | 0.14             |
| Gene Expression Change (log2(FC)) | GATA-1 (20kb TSS)                   | 11              | 5098         | 1000   | 1    | 4333           | 765           | 100      | 0.13         | 0.13        | 0.13             |
| Gene Expression Change (log2(FC)) | GATA-1 (20kb TSS 10kb TES)          | 11              | 6131         | 1000   | 1    | 5211           | 920           | 100      | 0.12         | 0.12        | 0.12             |
| Gene Expression Change (log2(FC)) | GATA-1 (NEAREST GENE)               | 11              | 3926         | 1000   | 1    | 3337           | 589           | 100      | 0.13         | 0.13        | 0.13             |
| Gene Expression Change (log2(FC)) | 4 TFs, RNApol2, 9 Hist. Mod., DNA m | 61              | 2261         | 2000   | 30   | 1922           | 339           | 100      | 0.617        | 0.616       | 0.620            |
| GSM688817_H3K4me2 (ΔTGS)          | GATA-1                              | 5               | 6282         | 1000   | 2    | 5340           | 942           | 100      | 0.36         | 0.35        | 0.37             |
| GSM688818_H3K4me3 (ΔTGS)          | GATA-1                              | 5               | 5795         | 1000   | 2    | 4926           | 869           | 100      | 0.29         | 0.29        | 0.31             |
| GSM688819_H3K9Ac (ΔTGS)           | GATA-1                              | 5               | 4742         | 1000   | 1    | 4031           | 711           | 100      | 0.22         | 0.20        | 0.23             |
| GSM688823_H4K16Ac (ΔTGS)          | GATA-1                              | 5               | 4889         | 1000   | 1    | 4156           | 733           | 100      | 0.29         | 0.28        | 0.30             |
| GSM688821_H3K36me3 (ΔTGS)         | GATA-1                              | 5               | 4041         | 1000   | 1    | 3435           | 606           | 100      | 0.18         | 0.19        | 0.21             |
| GSM688822_H3K79me2 (ΔTGS)         | GATA-1                              | 5               | 5031         | 1000   | 1    | 4276           | 755           | 100      | 0.31         | 0.31        | 0.32             |
| GSM688820_H3K27me3 (ΔTGS)         | GATA-1                              | 5               | 3905         | 1000   | 1    | 3319           | 586           | 100      | 0.06         | 0.07        | 0.07             |
| GSM688824_RNAPolIII (ΔTGS)        | GATA-1                              | 5               | 3588         | 1000   | 1    | 3050           | 538           | 100      | 0.23         | 0.24        | 0.26             |
| GSM688817_H3K4me2 (ΔTGS)          | GATA-1, TAL-1, EKLF                 | 11              | 6282         | 1000   | 3    | 5340           | 942           | 100      | 0.56         | 0.55        | 0.56             |
| GSM688818_H3K4me3 (ΔTGS)          | GATA-1, TAL-1, EKLF                 | 11              | 5795         | 1000   | 4    | 4926           | 869           | 100      | 0.47         | 0.47        | 0.48             |
| GSM688819_H3K9Ac (ΔTGS)           | GATA-1, TAL-1, EKLF                 | 11              | 4742         | 1000   | 2    | 4031           | 711           | 100      | 0.43         | 0.43        | 0.44             |
| GSM688823_H4K16Ac (ΔTGS)          | GATA-1, TAL-1, EKLF                 | 11              | 4889         | 1000   | 8    | 4156           | 733           | 100      | 0.47         | 0.48        | 0.47             |
| GSM688821_H3K36me3 (ΔTGS)         | GATA-1, TAL-1, EKLF                 | 11              | 4041         | 1000   | 2    | 3435           | 606           | 100      | 0.29         | 0.29        | 0.3              |
| GSM688822_H3K79me2 (ΔTGS)         | GATA-1, TAL-1, EKLF                 | 11              | 5031         | 1000   | 2    | 4276           | 755           | 100      | 0.45         | 0.46        | 0.46             |
| GSM688820_H3K27me3 (ΔTGS)         | GATA-1, TAL-1, EKLF                 | 11              | 3905         | 1000   | 6    | 3319           | 586           | 100      | 0.20         | 0.19        | 0.21             |
| GSM688824_RNAPolIII (ΔTGS)        | GATA-1, TAL-1, EKLF                 | 11              | 3588         | 1000   | 10   | 3050           | 538           | 100      | 0.47         | 0.49        | 0.45             |
| GSM688810_H3K9Ac (Ter119+ TGS)    | GATA-1                              | 4               | 4179         | 1000   | 1    | 3552           | 627           | 100      | 0.31         | 0.30        | 0.34             |
| GSM688814_H4K16Ac (Ter119+ TGS)   | GATA-1                              | 4               | 3756         | 1000   | 1    | 3193           | 563           | 100      | 0.41         | 0.41        | 0.42             |
| GSM802477_H3K27Ac (Ter119+ TGS)   | GATA-1                              | 4               | 3715         | 1000   | 1    | 3158           | 557           | 100      | 0.44         | 0.45        | 0.46             |
| GSM688810_H3K9Ac (Ter119+ TGS)    | GATA-1, TAL-1, EKLF                 | 10              | 4179         | 1000   | 3    | 3552           | 627           | 100      | 0.66         | 0.66        | 0.67             |
| GSM688814_H4K16Ac (Ter119+ TGS)   | GATA-1, TAL-1, EKLF                 | 10              | 3756         | 1000   | 3    | 3193           | 563           | 100      | 0.58         | 0.58        | 0.59             |
| GSM802477_H3K27Ac (Ter119+ TGS)   | GATA-1, TAL-1, EKLF                 | 10              | 3715         | 1000   | 3    | 3158           | 557           | 100      | 0.64         | 0.64        | 0.66             |
| GSM689846_H3K4me1 (Ter119+ TGS)   | GATA-1                              | 4               | 2963         | 1000   | 1    | 2519           | 444           | 100      | 0.30         | 0.30        | 0.31             |
| GSM688817_H3K4me2 (Ter119+ TGS)   | GATA-1                              | 4               | 5478         | 1000   | 1    | 4656           | 822           | 100      | 0.42         | 0.42        | 0.43             |
| GSM688818_H3K4me3 (Ter119+ TGS)   | GATA-1                              | 4               | 5207         | 1000   | 1    | 4426           | 781           | 100      | 0.35         | 0.35        | 0.37             |
| GSM689846_H3K4me1 (Ter119+ TGS)   | GATA-1, TAL-1, EKLF                 | 10              | 2963         | 1000   | 3    | 2519           | 444           | 100      | 0.51         | 0.52        | 0.52             |
| GSM688817_H3K4me2 (Ter119+ TGS)   | GATA-1, TAL-1, EKLF                 | 10              | 5478         | 1000   | 3    | 4656           | 822           | 100      | 0.64         | 0.64        | 0.65             |
| GSM688818_H3K4me3 (Ter119+ TGS)   | GATA-1, TAL-1, EKLF                 | 10              | 5207         | 1000   | 3    | 4426           | 781           | 100      | 0.58         | 0.58        | 0.60             |

Table S3. Overview of Random Forest parameters and results

**TABLE S4**

| <b>Mark Variation</b> | <b>%IncMSE</b> |
|-----------------------|----------------|
| H3K79me2_diff         | 50.8           |
| H3K4me2_diff          | 28.7           |
| H3K4me3_diff          | 25.6           |
| H3K9Ac_diff           | 17.7           |
| RNAPoII_diff          | 17.7           |
| GATA1_diff            | 16.4           |
| H4K16Ac_diff          | 14.6           |
| H3K36me3_diff         | 5.8            |
| H3K27me3_diff         | 4.4            |
| TAL1_diff             | 3.1            |
| <b>Average</b>        | <b>18.5</b>    |
|                       |                |
| <b>Ter119- Levels</b> | <b>%IncMSE</b> |
| GSM688822_H3K79me2neg | 24.7           |
| GSM688818_H3K4me3neg  | 17.6           |
| GSM688821_H3K36me3neg | 16.5           |
| GSM688819_H3K9Acneg   | 15.1           |
| GSM688823_H4K16Acneg  | 14.2           |
| GSM688817_H3K4me2neg  | 13.8           |
| GSM688824_RNAPoIIneg  | 12.4           |
| GSM688820_H3K27me3neg | 11.9           |
| GATA-1_Ter119neg      | 8.6            |
| GSM464634_TAL1_neg    | 5.1            |
| <b>Average</b>        | <b>14.0</b>    |
|                       |                |
| <b>Ter119+ Levels</b> | <b>%IncMSE</b> |
| GSM688809_H3K4me3pos  | 18.0           |
| GSM688814_H4K16Acpos  | 17.0           |
| GSM688815_RNAPoIIpos  | 16.9           |
| GSM688810_H3K9Acpos   | 16.7           |
| GSM688813_H3K79me2pos | 16.5           |
| GSM688812_H3K36me3pos | 16.4           |
| GSM802477_H3K27Acpos  | 14.2           |
| GATA-1_Ter119pos      | 12.3           |
| GSM688811_H3K27me3pos | 10.5           |
| GSM688808_H3K4me2pos  | 9.8            |
| GSM689846_H3K4me1pos  | 8.2            |
| GSM746584_TAL1_pos    | 7.8            |
| GSM530030_KLF1        | 5.1            |
| GSM545888_PU1         | 3.9            |
| <b>Average</b>        | <b>12.4</b>    |

Table S4. Variable importance measures (%IncMSE) in predicting gene expression changes between Ter119- and Ter119+ erythroid cells

# FIGURE S1

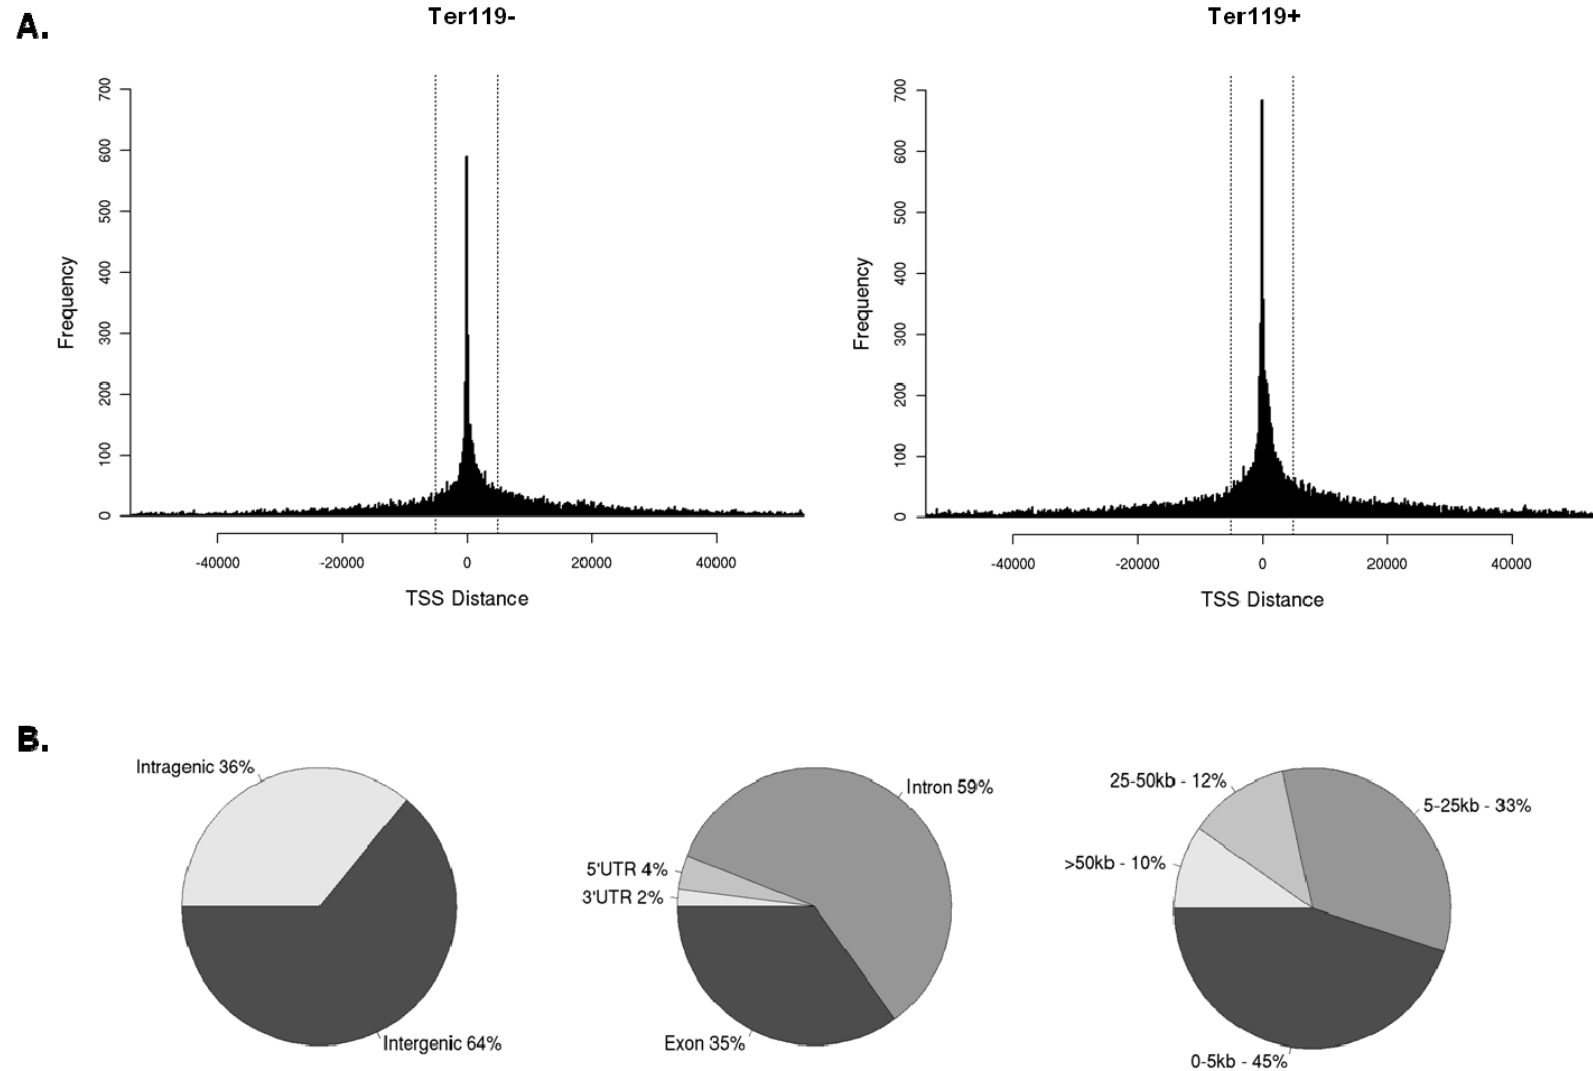

## Supplementary Figure S1. Distribution of GATA-1 chromatin occupancy in Ter119- and Ter119+ cells

A. Distribution of the distances between GATA-1 identified peaks from annotated gene TSSs

B. Location analysis of GATA-1 peaks. Left: Percentage of intragenic and intergenic peaks. Middle: Distribution of intragenic GATA-1 peaks in 5'UTR, 3'UTR, introns and exons. Right: Distribution of intergenic GATA-1 peaks in 0-5kb, 5-25kb, 25-50kb and >50kb windows from TSS.

# FIGURE S2

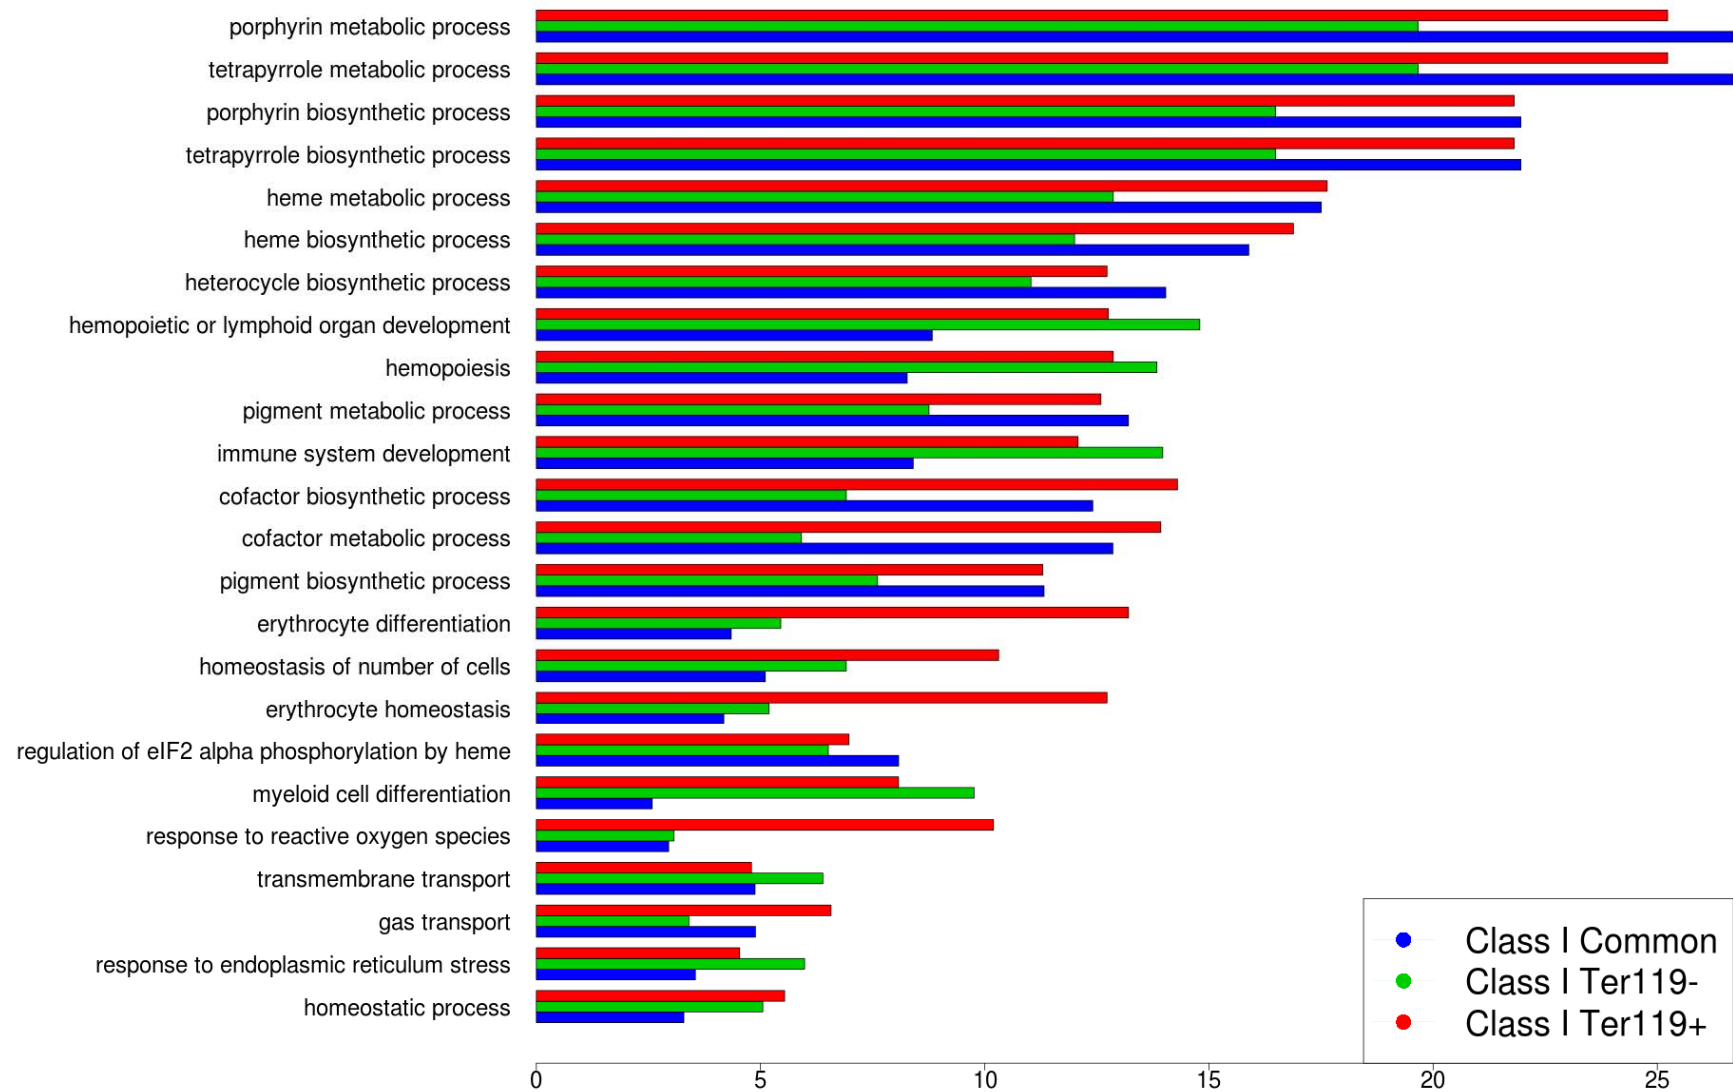

## Supplementary Figure S2. GO analysis of GATA-1 target genes composing the TGS Class I

Results are shown for genes identified in Ter119- (green bars) and Ter119+ (red bars). Blue bars refer to genes identified in both Ter119- and Ter119+ cells with a TGS score higher than 500 (Class I threshold).

# FIGURE S3

**A**

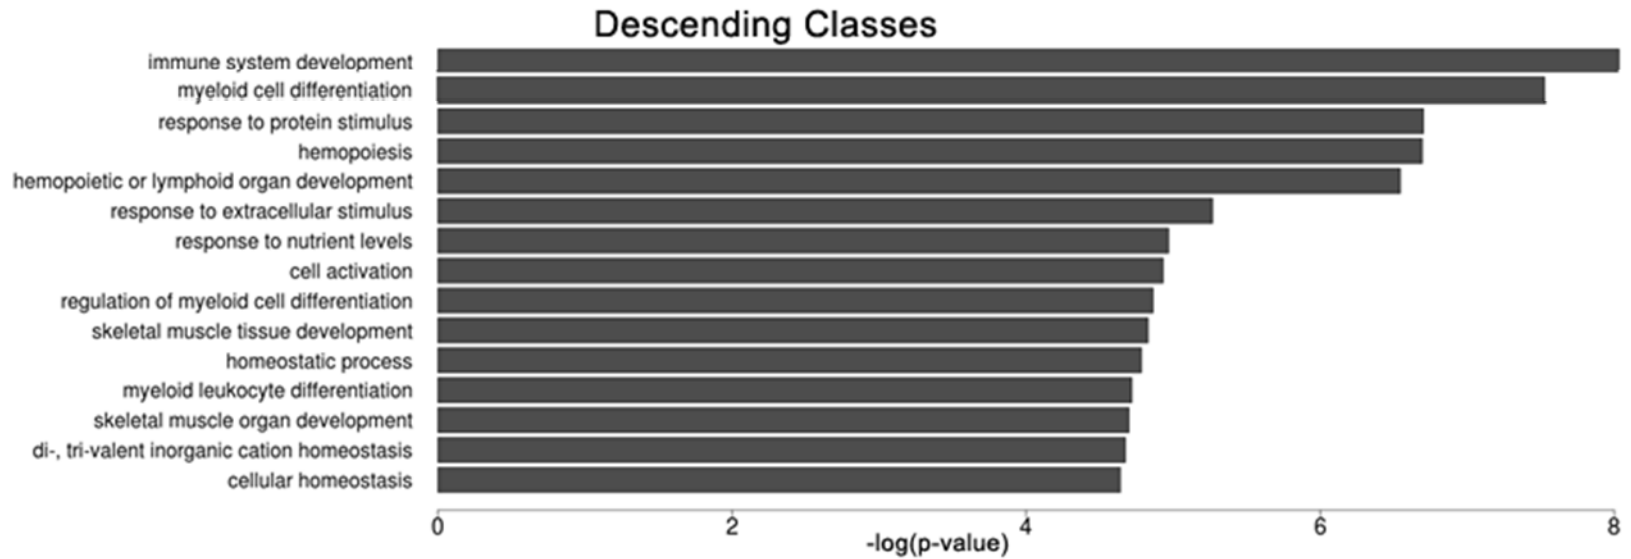

**B**

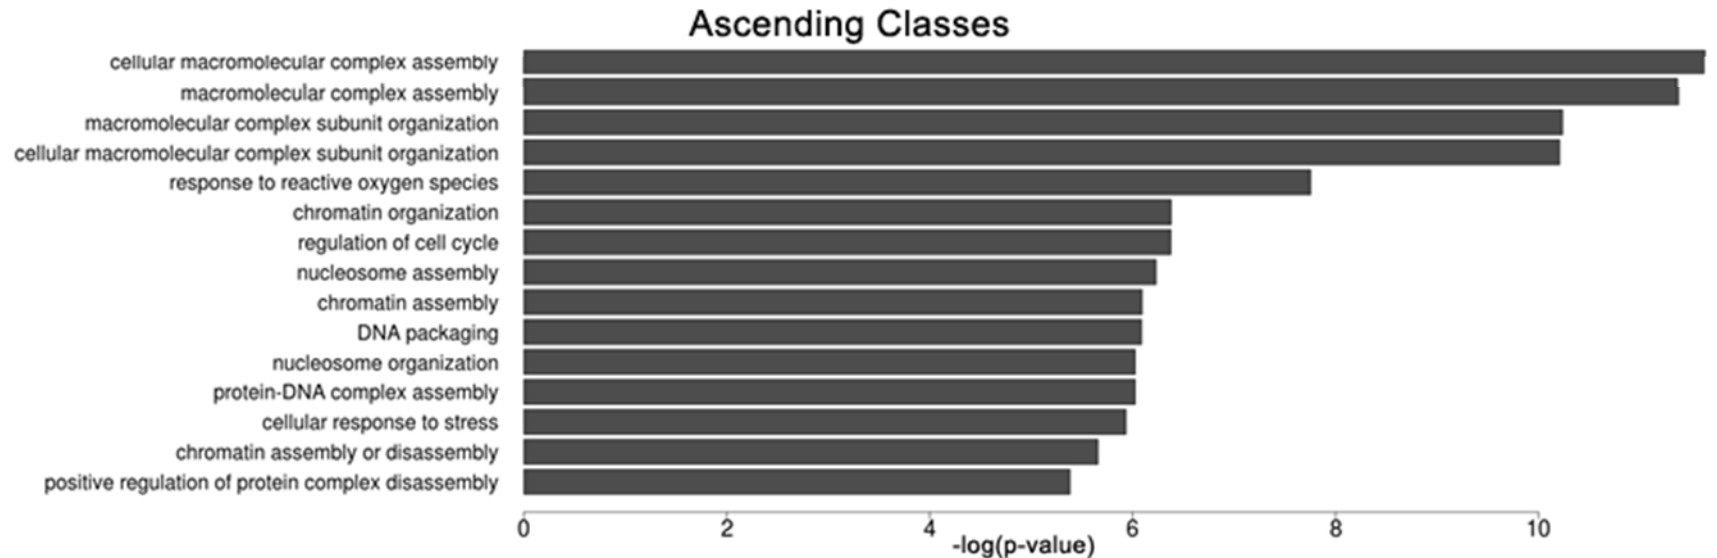

**Supplementary Figure S3. GO analysis of GATA-1 target genes switching TGS Classes**  
**Results are shown for genes identified in Ter119- and Ter119+ that fall in different TGS classes in each dataset.**

A. Descending genes transition to a lower TGS class with differentiation.

B. Ascending genes represent genes transitioning to a higher TGS class with differentiation

**FIGURE S4**

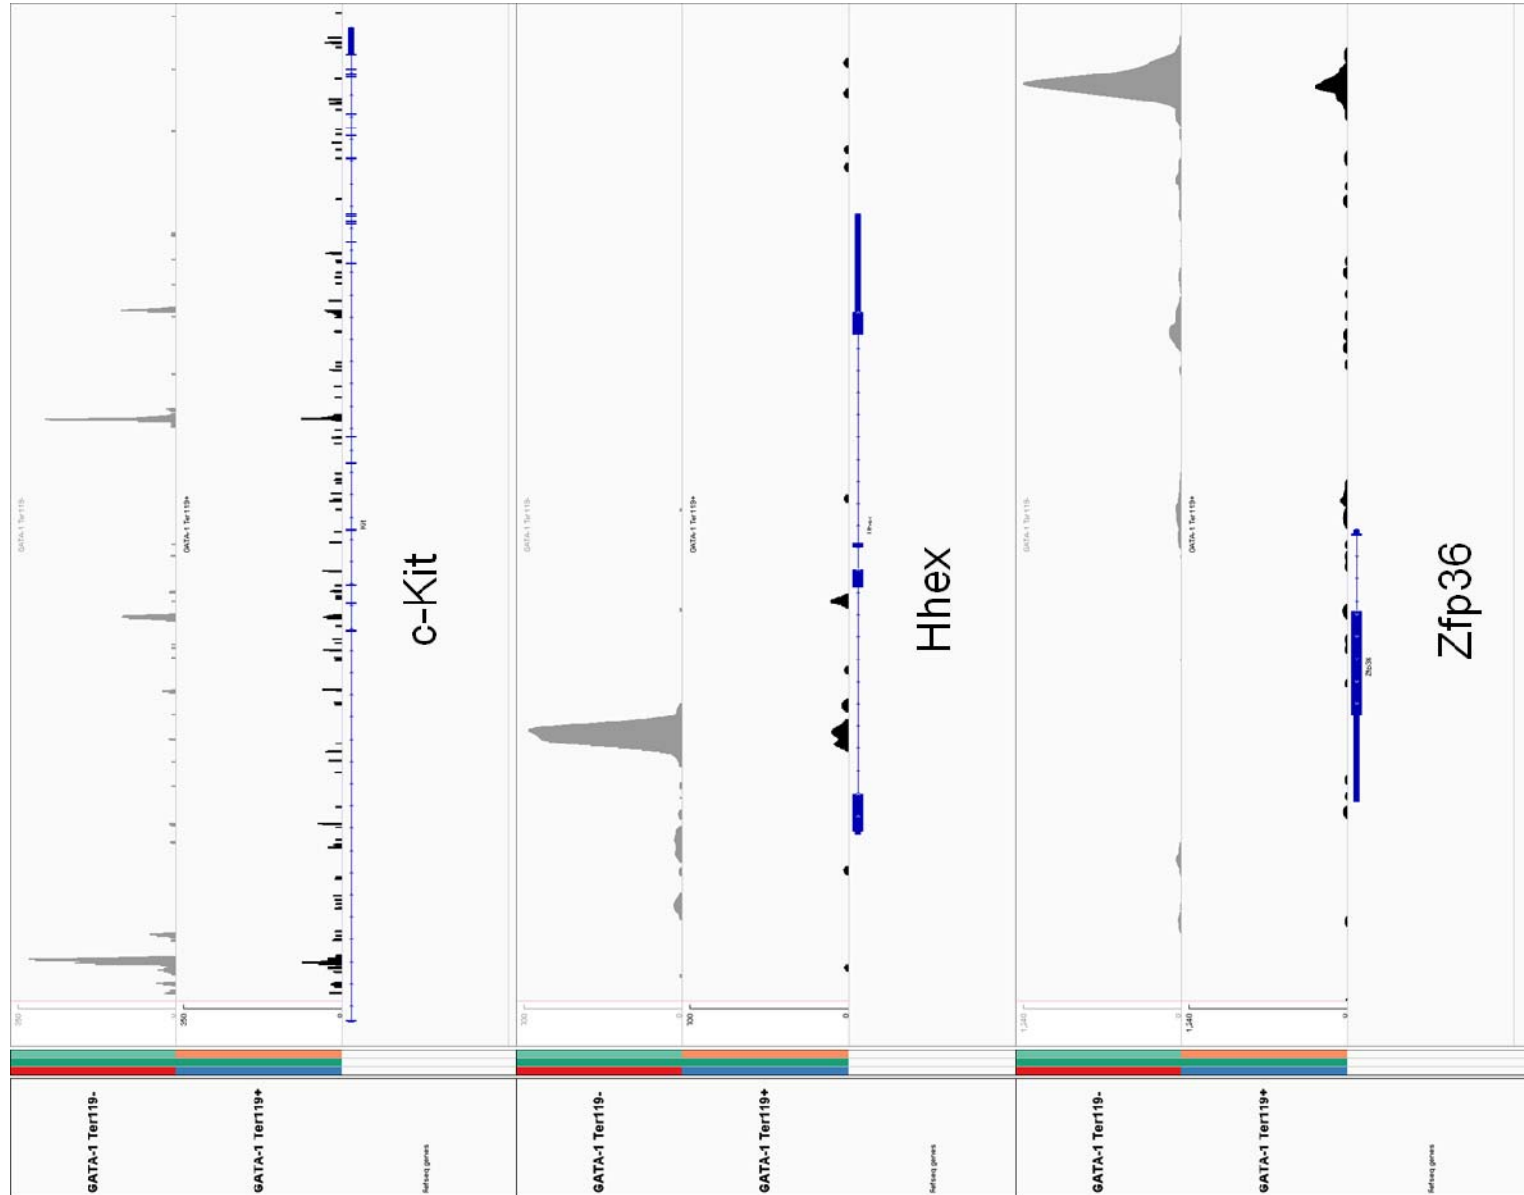

**Supplementary Figure S4. Examples of GATA-1 enrichment profiles of genes showing decreasing GATA-1 levels**

**FIGURE S5**

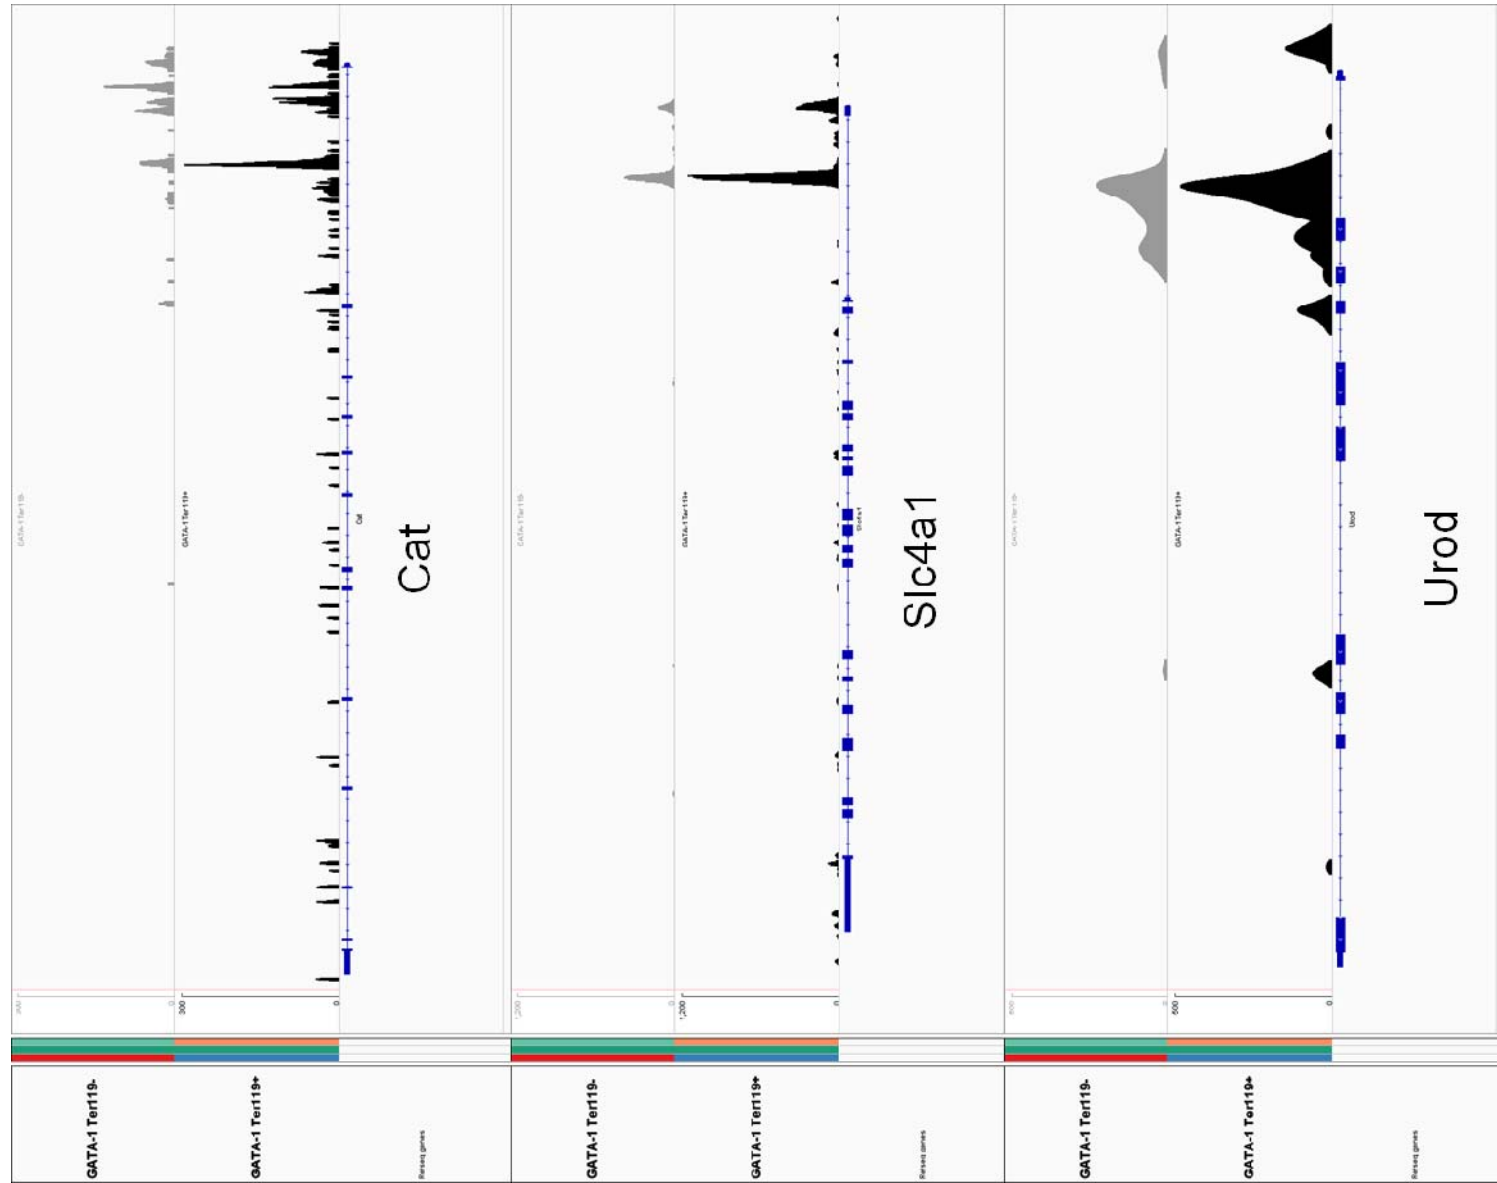

**Supplementary Figure S5. Examples of GATA-1 enrichment profiles of genes showing increasing GATA-1 levels**



**FIGURE S6**

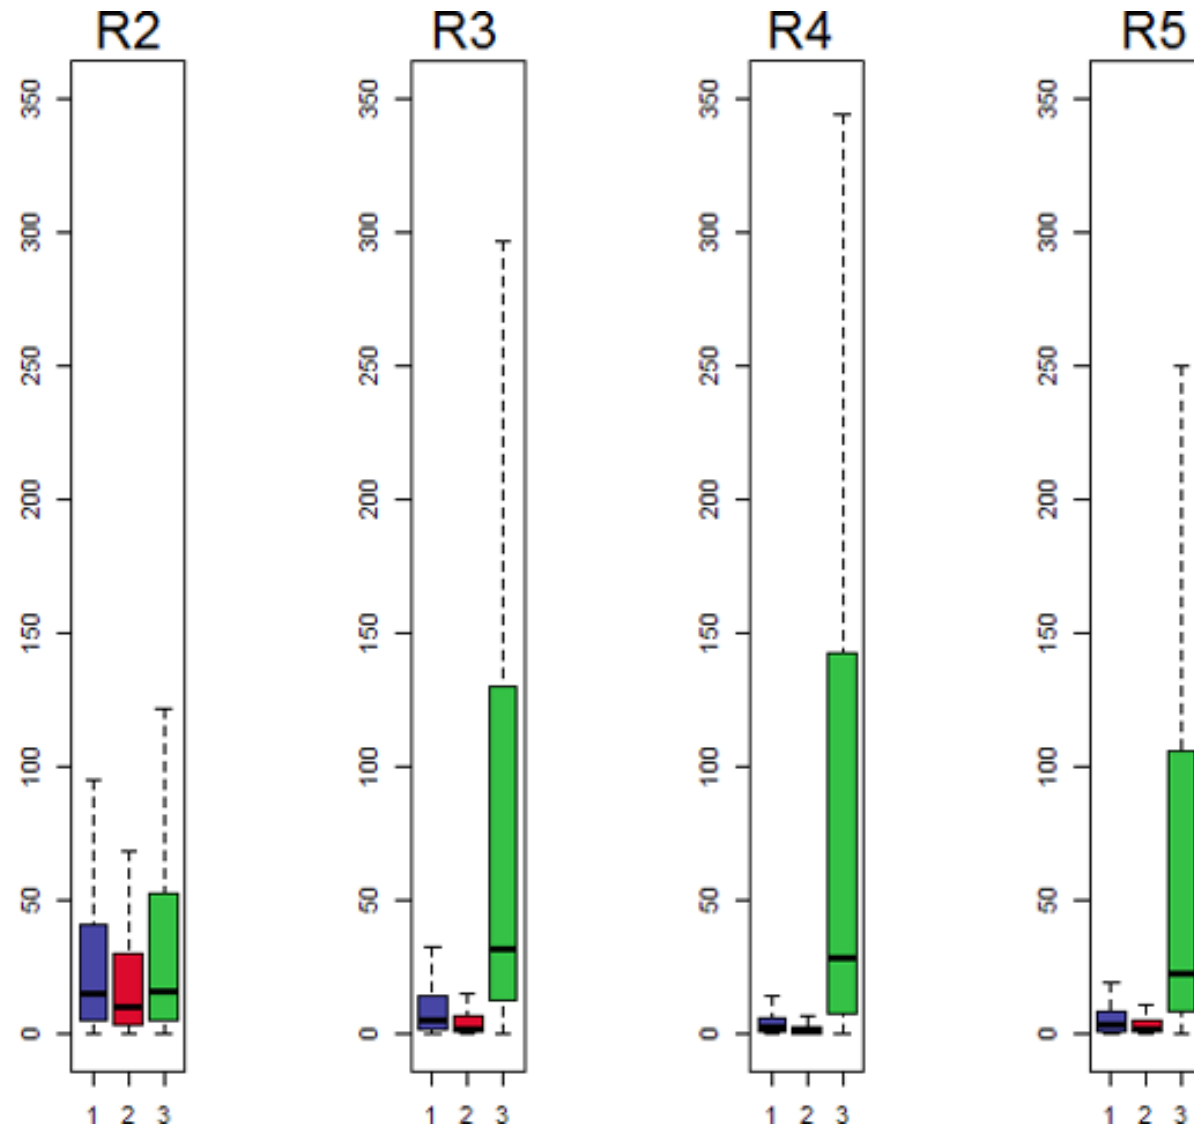

**Supplementary Figure S6. Absolute mRNA levels of clustered GATA-1 target genes**

Boxplots illustrating the distribution of absolute mRNA levels between genes composing each of the three identified clusters along the R2 to R5 stages of erythroid differentiation
